# Supplementary material
Source: PubMed Central journal article supplement (PMC11644584)
Supplement: JGMED24000811.pdf [file JGMED24000811.pdf]

Chambers JY, Rippon J, Ahle D, Le X, Miller B, Moreno A. Is the future green? Assessing environmental health confidence in internal medicine residents. *J Grad Med Educ.* 2024;16(suppl 1):99-103. DOI: <http://dx.doi.org/10.4300/JGME-D-24-00081.1>

**Supplementary Data**

Supplement 1. Individuals and groups interviewed to define core content areas.

| GME Faculty                                                                                                                                                                                                                                                                                                                                                                                        | UME                                                                                                                                                                                                                                                                                                        | Non-Clinical Researchers                                                                                                                                                                                                                                   | Community and Public Health                                                                                                                                                                                                                                                                                                                          |
|----------------------------------------------------------------------------------------------------------------------------------------------------------------------------------------------------------------------------------------------------------------------------------------------------------------------------------------------------------------------------------------------------|------------------------------------------------------------------------------------------------------------------------------------------------------------------------------------------------------------------------------------------------------------------------------------------------------------|------------------------------------------------------------------------------------------------------------------------------------------------------------------------------------------------------------------------------------------------------------|------------------------------------------------------------------------------------------------------------------------------------------------------------------------------------------------------------------------------------------------------------------------------------------------------------------------------------------------------|
| <ul style="list-style-type: none"> <li>• Own institution's environmental health &amp; research center</li> <li>• Own institution's Pediatrics and Family Medicine residencies</li> <li>• Outside GME programs</li> <li>• Infectious disease, Rheumatology, Cardiology, Gastroenterology, Endocrinology, Pulmonology, Allergy and Immunology, and Hematology/Oncology Fellowship faculty</li> </ul> | <ul style="list-style-type: none"> <li>• Faculty who currently or previously implemented curricula at own and outside institutions</li> <li>• Graduating medical students who had taken environmental health electives or courses</li> <li>• Veterinary faculty regarding "One Health" concepts</li> </ul> | <ul style="list-style-type: none"> <li>• Academic toxicologists and biochemists</li> <li>• Doctorate-level researchers in water quality and water systems</li> <li>• Doctorate-level researchers in xenoestrogens and environmental carcinogens</li> </ul> | <ul style="list-style-type: none"> <li>• Academic public health faculty</li> <li>• Local public health clinicians</li> <li>• Community environmental justice organizations</li> <li>• Veterans with exposures to chemicals of war</li> <li>• Migrant worker programs</li> <li>• Political advocates for air and water quality protections</li> </ul> |

Supplement 2. Process for outlining core topics.

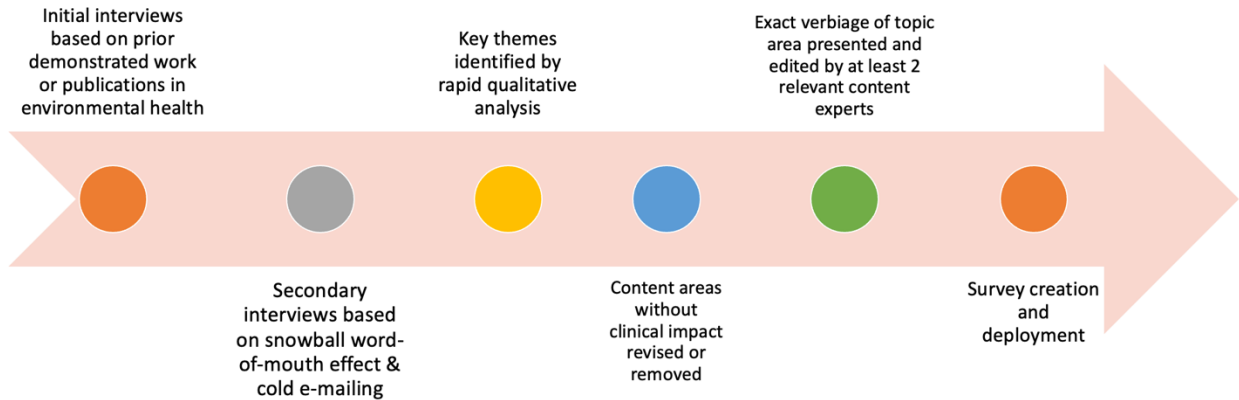

Supplement 3. Survey instrument.

Chambers JY, Rippon J, Ahle D, Le X, Miller B, Moreno A. Is the future green? Assessing environmental health confidence in internal medicine residents. *J Grad Med Educ.* 2024;16(suppl 1):99-103. DOI: <http://dx.doi.org/10.4300/JGME-D-24-00081.1>

How confident would you feel explaining the following environmental health topics to a friend or peer?

|                                | Not Confident At All  | Slightly Confident    | Somewhat Confident    | Fairly Confident      | Completely Confident  |
|--------------------------------|-----------------------|-----------------------|-----------------------|-----------------------|-----------------------|
| Air pollution/Air quality      | <input type="radio"/> |
| Endocrine disruptors           | <input type="radio"/> |
| Environmental justice          | <input type="radio"/> |
| Extreme weather impacts        | <input type="radio"/> |
| Food security & sustainability | <input type="radio"/> |
| Global health impacts          | <input type="radio"/> |
| Hazardous waste disposal       | <input type="radio"/> |
| Heat stress and kidney disease | <input type="radio"/> |
| Occupational disease           | <input type="radio"/> |
| Spread of infectious disease   | <input type="radio"/> |
| Toxicology                     | <input type="radio"/> |
| Water quality                  | <input type="radio"/> |

Supplement 4. Results of Bonferroni correction for multiple comparisons.

| Topic                            | Topic                            | p-value                   |
|----------------------------------|----------------------------------|---------------------------|
| Endocrine disruptors             | Food security and sustainability | $p = 7.97 \times 10^{-6}$ |
| Endocrine disruptors             | Spread of infectious disease     | $p = 1.45 \times 10^{-7}$ |
| Environmental justice            | Spread of infectious disease     | $p = 1.28 \times 10^{-4}$ |
| Food security and sustainability | Hazardous waste disposal         | $p = 3.70 \times 10^{-6}$ |
| Food security and sustainability | Water quality                    | $p = 1.12 \times 10^{-4}$ |
| Hazardous waste disposal         | Spread of infectious disease     | $p = 5.88 \times 10^{-8}$ |
| Spread of infectious disease     | Toxicology                       | $p = 2.98 \times 10^{-5}$ |
| Spread of infectious disease     | Water quality                    | $p = 2.64 \times 10^{-6}$ |

Supplement 5. Mean resident response across all content areas.

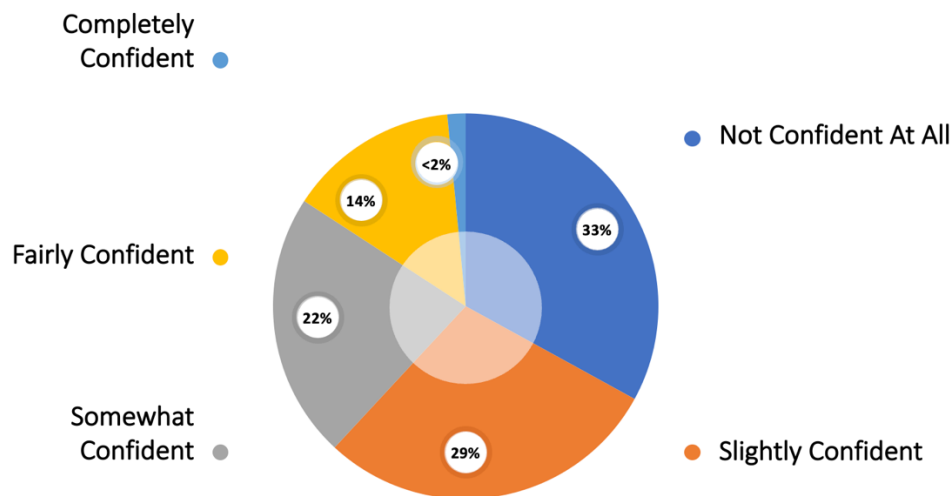

Chambers JY, Rippon J, Ahle D, Le X, Miller B, Moreno A. Is the future green? Assessing environmental health confidence in internal medicine residents. *J Grad Med Educ.* 2024;16(suppl 1):99-103. DOI: <http://dx.doi.org/10.4300/JGME-D-24-00081.1>

Supplement 5. Breakdown of response frequency by category for Environmental Justice.

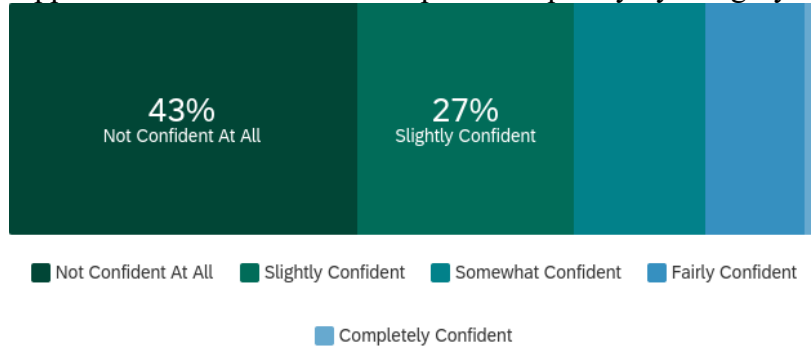

# Environmental Health Confidence in Internal Medicine

**INTRODUCTION** Medical societies are increasingly calling for climate change education in medical training. This study assesses how internal medicine residents assess their own confidence explaining environmental health topics to a peer.

## METHODS

- **Design:** electronic survey with topic areas defined by content experts
- **Who:** internal medicine residents at one institution (n=110) in 2023
- **What:** confidence across 12 areas:

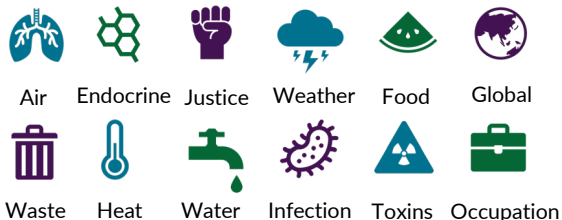

## RESULTS

56% response rate

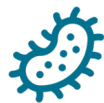

2.92

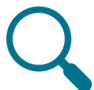

2.22 (mean)

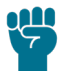

1.76

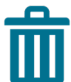

1.73

Mean confidence ratings on Likert scale (from 1, not confident at all, to 5, complete confidence)

## LIMITATIONS

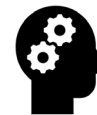

Measurement of confidence may not represent actual skills

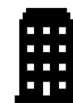

Single site with one program may not be representative

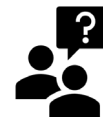

Ambiguous survey terminology may have introduced variation

**CONCLUSIONS** Internal medicine residents report low confidence levels regarding their ability to explain multiple environmental health topics to their peers.
